# Supplementary material
Source: Frontiers journal article supplement (https://www.frontiersin.org/articles/486367)
Supplement: Data_Sheet_3.PDF [file Data_Sheet_3.PDF]

## Studies

### Included studies

#### *Camtosun 2017*

### References

Ahmet Camtosun, Huseyin Celik, Ramazan Altintas, Ibrahim Topcu, Cemal Tasdemir. Does preoperative neutrophil-to-lymphocyte ratio have a value in predicting recurrence in bladder tumour after intravesical BCG treatment? Biomedical Research 2017;28(1):36-40.

### Characteristics

|                      |                       |
|----------------------|-----------------------|
| <b>Methods</b>       | Retrospective         |
| <b>Participants</b>  | TURBR, NMIBC, BCG, 89 |
| <b>Interventions</b> | pre-treatment NLR     |
| <b>Outcomes</b>      | Recurrence            |
| <b>Notes</b>         |                       |

### Risk of bias table

| Bias                                                                     | Authors' judgement | Support for judgement                                                                        |
|--------------------------------------------------------------------------|--------------------|----------------------------------------------------------------------------------------------|
| Representativeness of the exposed cohort                                 | Low risk           | Somewhat representative                                                                      |
| Selection of the non-exposed cohort                                      | Low risk           | Drawn from the same community as the exposed cohort                                          |
| Ascertainment of exposure                                                | Low risk           | Secure record (Laboratory results)                                                           |
| Demonstration that outcome of interest was not present at start of study | Low risk           | Yes                                                                                          |
| Controls for Most importat factor                                        | Unclear risk       | Cohorts are not comparable on the basis of the design or analysis controlled for confounders |
| Study controls for any additional factor                                 | Unclear risk       | Cohorts are not comparable on the basis of the design or analysis controlled for confounders |
| Assessment of outcome                                                    | Low risk           | Record linkage                                                                               |
| Was follow-up long enough for outcomes to occur                          | High risk          | No. 28.7 monts (12-78), too short                                                            |
| Adequacy of follow up of cohorts                                         | Unclear risk       | Almost 1/3 show recurrence, no description                                                   |

### Results data

**Can 2012****References**

C.Can . B.Baseskioglu, M.Yilmaz, E. Colak , A. Ozen, A. Yenilmez. Pretreatment parameters obtained from peripheral blood sample predicts invasiveness of bladder carcinoma. Urologia Internationalis 2012;89(4):468-472. [DOI: 10.1159/000343278]

**Characteristics**

|                      |                          |
|----------------------|--------------------------|
| <b>Methods</b>       | Retrospective            |
| <b>Participants</b>  | TURBT, MIBC + NMIBC, 182 |
| <b>Interventions</b> | pre-operative NLR (2.57) |
| <b>Outcomes</b>      | Muscle invasiveness      |
| <b>Notes</b>         |                          |

**Risk of bias table**

| <b>Bias</b>                                                              | <b>Authors' judgement</b> | <b>Support for judgement</b>                                                                                                                                     |
|--------------------------------------------------------------------------|---------------------------|------------------------------------------------------------------------------------------------------------------------------------------------------------------|
| Representativeness of the exposed cohort                                 | Low risk                  | Somewhat representative                                                                                                                                          |
| Selection of the non-exposed cohort                                      | Low risk                  | Drawn from the same community as the exposed cohort                                                                                                              |
| Ascertainment of exposure                                                | Low risk                  | Secure record (laboratory result)                                                                                                                                |
| Demonstration that outcome of interest was not present at start of study | High risk                 | No. We don't know time sequence relation of NLR to pathologic aggressiveness.                                                                                    |
| Controls for Most importat factor                                        | Unclear risk              | Laboratory result (PLT, NLR), Age, Gender is not only related factor with pathologic aggressiveness. Clinical T stage or CIS, urine cytology were more important |
| Study controls for any additional factor                                 | Unclear risk              | not much information.                                                                                                                                            |
| Assessment of outcome                                                    | Low risk                  | Record linkage                                                                                                                                                   |
| Was follow-up long enough for outcomes to occur                          | Low risk                  | Medican follow up was 45 months and range of 6–180 months. But this study not needs long follow up                                                               |
| Adequacy of follow up of cohorts                                         | Low risk                  | MIBC : NMIBC = 102 : 80                                                                                                                                          |

**Results data****Favilla 2016**

## References

Vincenzo Favilla, Tommaso Castelli, Daniele Urzi , Giulio Reale, Salvatore Privitera, Antonio Salici, Giorgio Ivan Russo, Sebastiano Cimino, Giuseppe Morgia. Neutrophil to lymphocyte ratio, a biomarker in non-muscle invasive bladder cancer: A single-institutional longitudinal study. International Braz J Urol 2016;42(4):658-693. [DOI: 10.1590/S1677-5538.IBJU.2015.0243]

## Characteristics

|                      |                                                                   |
|----------------------|-------------------------------------------------------------------|
| <b>Methods</b>       | Retrospective                                                     |
| <b>Participants</b>  | TURBT, NMIBC, 178 patients                                        |
| <b>Interventions</b> | pre treatment NLR level ( $\geq 3$ )                              |
| <b>Outcomes</b>      | 5 year recurrence free survival, 5 year progression free survival |
| <b>Notes</b>         |                                                                   |

## Risk of bias table

| Bias                                                                     | Authors' judgement | Support for judgement                                                                                                                                                |
|--------------------------------------------------------------------------|--------------------|----------------------------------------------------------------------------------------------------------------------------------------------------------------------|
| Representativeness of the exposed cohort                                 | Low risk           | Somewhat representative                                                                                                                                              |
| Selection of the non-exposed cohort                                      | Low risk           | Drawn from the same community as the exposed cohort                                                                                                                  |
| Ascertainment of exposure                                                | Low risk           | Secure record (Laboratory results)                                                                                                                                   |
| Demonstration that outcome of interest was not present at start of study | Low risk           | Yes                                                                                                                                                                  |
| Controls for Most important factor                                       | Low risk           | Yes, pathologic stage concomitant CIS                                                                                                                                |
| Study controls for any additional factor                                 | Low risk           | Yes, Smoking, number of tumors, Tumor size                                                                                                                           |
| Assessment of outcome                                                    | Low risk           | Record linkage                                                                                                                                                       |
| Was follow-up long enough for outcomes to occur                          | Low risk           | Yes                                                                                                                                                                  |
| Adequacy of follow up of cohorts                                         | Low risk           | Subjects lost to follow up unlikely to introduce bias- number lost less than or equal to 20% or description of those lost suggested no different from those followed |

## Results data

### Lee 2015

## References

Su-Min Lee, Andrew Russell, Giles Hellawell. Predictive value of pretreatment inflammation-based prognostic scores (Neutrophil-to-lymphocyte ratio, platelet-to-lymphocyte ratio, and lymphocyte-to-monocyte ratio) for invasive bladder carcinoma. Korean Journal of Urology 2015;56(11):749-755. [DOI: 10.4111/kju.2015.56.11.749]

## Characteristics

|                      |                         |
|----------------------|-------------------------|
| <b>Methods</b>       | Retrospective           |
| <b>Participants</b>  | TURBT, NMIBC+MIBC, 226  |
| <b>Interventions</b> | NLR, LMR, PLR           |
| <b>Outcomes</b>      | Pathologic invasiveness |
| <b>Notes</b>         |                         |

## Risk of bias table

| Bias                                                                     | Authors' judgement | Support for judgement                                                                   |
|--------------------------------------------------------------------------|--------------------|-----------------------------------------------------------------------------------------|
| Representativeness of the exposed cohort                                 | Low risk           | Somewhat representative                                                                 |
| Selection of the non-exposed cohort                                      | Low risk           | Drawn from the same community as the exposed cohort                                     |
| Ascertainment of exposure                                                | Low risk           | Secure record (Laboratory results)                                                      |
| Demonstration that outcome of interest was not present at start of study | Unclear risk       | NO, Uncertain                                                                           |
| Controls for Most important factor                                       | Low risk           | Clinical, Pathologic feature (T stage, grade , number ) included                        |
| Study controls for any additional factor                                 | Unclear risk       | Uncertain                                                                               |
| Assessment of outcome                                                    | Low risk           | Record linkage                                                                          |
| Was follow-up long enough for outcomes to occur                          | Low risk           | Yes                                                                                     |
| Adequacy of follow up of cohorts                                         | Low risk           | 175 for NMIBC, 51 for MIBC. Not need follow up interval for this cross-sectional study. |

## Results data

### *Mano 2015*

## References

Roy Mano, Jack Baniel, Ohad Shoshany, David Margel, Tomer Bar-On, Ofer Nativ, Jacob Rubinstein, Sarel Halachmi. Neutrophil-to-lymphocyte ratio predicts progression and recurrence of non-muscle-invasive bladder cancer. Urologic Oncology 2015;33(2):67e1-67e7. [DOI: <http://dx.doi.org/10.1016/j.urolonc.2014.06.010>]

## Characteristics

|                      |                            |
|----------------------|----------------------------|
| <b>Methods</b>       | Retrospective              |
| <b>Participants</b>  | TURBT, NMIBC, 122          |
| <b>Interventions</b> | pre-operative NLR (> 2.41) |
| <b>Outcomes</b>      | Recurrence, Progression    |
| <b>Notes</b>         |                            |

## Risk of bias table

| Bias                                                                     | Authors' judgement | Support for judgement                                                                 |
|--------------------------------------------------------------------------|--------------------|---------------------------------------------------------------------------------------|
| Representativeness of the exposed cohort                                 | Low risk           | Somewhat representative                                                               |
| Selection of the non-exposed cohort                                      | Low risk           | Drawn from the same community as the exposed cohort                                   |
| Ascertainment of exposure                                                | Low risk           | Secure record (Laboratory results)                                                    |
| Demonstration that outcome of interest was not present at start of study | Low risk           | Yes                                                                                   |
| Controls for Most important factor                                       | Low risk           | Yes, T stage ,Size, Multiplicity and CIS                                              |
| Study controls for any additional factor                                 | Low risk           | Yes, Smoking history                                                                  |
| Assessment of outcome                                                    | Low risk           | Record linkage                                                                        |
| Was follow-up long enough for outcomes to occur                          | High risk          | No. 3 year recurrence and progression is too short for assessing oncological outcomes |
| Adequacy of follow up of cohorts                                         | Unclear risk       | 64% was recurred, Unclear risk, Median follow up for recurrence was 40 months.        |

## Results data

### Ogihara 2016

## References

Ogihara Koichiro, Kikuchi Eiji, Yuge Kazuyuki, Yanai Yoshinori, Matsumoto Kazuhiro, Miyajima Akira, Asakura Hirotaka, Oya Mototsugu. The Preoperative Neutrophil-to-lymphocyte Ratio is a Novel Biomarker for Predicting Worse Clinical Outcomes in Non- muscle Invasive Bladder Cancer Patients with a Previous History of Smoking. *Annals of Surgical Oncology* 2016;23:1039-1047. [DOI: 10.1245/s10434-016-5578-4]

## Characteristics

|                      |                                                                   |
|----------------------|-------------------------------------------------------------------|
| <b>Methods</b>       | Retrospective                                                     |
| <b>Participants</b>  | TURBT, NMIBC, 605 patients                                        |
| <b>Interventions</b> | pre treatment NLR level ( $\geq 2.2$ )                            |
| <b>Outcomes</b>      | 5 year recurrence free survival, 5 year progression free survival |
| <b>Notes</b>         |                                                                   |

### Risk of bias table

| Bias                                                                     | Authors' judgement | Support for judgement                                    |
|--------------------------------------------------------------------------|--------------------|----------------------------------------------------------|
| Representativeness of the exposed cohort                                 | Low risk           | Somewhat representative                                  |
| Selection of the non-exposed cohort                                      | Low risk           | Drawn from the same community as the exposed cohort      |
| Ascertainment of exposure                                                | Low risk           | Secure record                                            |
| Demonstration that outcome of interest was not present at start of study | Low risk           | Yes                                                      |
| Controls for Most important factor                                       | Low risk           | Yes, Include pathologic stage, grade and concomitant CIS |
| Study controls for any additional factor                                 | Low risk           | Yes, Smoking history etc                                 |
| Assessment of outcome                                                    | Low risk           | Record linkage                                           |
| Was follow-up long enough for outcomes to occur                          | Low risk           | Yes                                                      |
| Adequacy of follow up of cohorts                                         | Low risk           | 5 year RFS was 68.4%                                     |

### Results data

#### *Ozyalvacli 2015*

### References

Mehmet Emin Ozyalvacli, Gulzade Ozyalvacli, Ramazan Kocaaslan, Kursat Cecen, Ugur Uyeturk, Eray Kemahli, Adnan Gucuk. Neutrophil-lymphocyte ratio as a predictor of recurrence and progression in patients with high-grade pT1 bladder cancer. *Can Urol Assoc J* 2015;9:126-131. [DOI: 10.5489/cuaj.2523]

### Characteristics

|                      |                                                                   |
|----------------------|-------------------------------------------------------------------|
| <b>Methods</b>       | Retrospective                                                     |
| <b>Participants</b>  | TURBT, NMIBC, 166                                                 |
| <b>Interventions</b> | pre-treatment NLR                                                 |
| <b>Outcomes</b>      | 5 year progression free survival, 5 year recurrence free survival |
| <b>Notes</b>         |                                                                   |

## Risk of bias table

| Bias                                                                     | Authors' judgement | Support for judgement                                                   |
|--------------------------------------------------------------------------|--------------------|-------------------------------------------------------------------------|
| Representativeness of the exposed cohort                                 | Low risk           | Somewhat representative                                                 |
| Selection of the non-exposed cohort                                      | Low risk           | Drawn from the same community as the exposed cohort                     |
| Ascertainment of exposure                                                | Low risk           | Secure record (laboratory exam)                                         |
| Demonstration that outcome of interest was not present at start of study | Low risk           | Yes                                                                     |
| Controls for Most important factor                                       | High risk          | No, Tumor pathology, CIS data not included                              |
| Study controls for any additional factor                                 | Low risk           | Yes, Smoking, BCG, MMC use information included                         |
| Assessment of outcome                                                    | Low risk           | Record linkage                                                          |
| Was follow-up long enough for outcomes to occur                          | Low risk           | 5-year is feasible for assessing outcome for recurrence and progression |
| Adequacy of follow up of cohorts                                         | High risk          | mean follow up 24.2 month                                               |

## Results data

***D'Andrea 2017***

## References

David D'Andrea, Marco Moschini, Kilian M. Gust,| Mohammad Abufaraj, Mehmet Özsoy, Romain Mathieu, Francesco Soria, Alberto Briganti, Morgan Rouprêt, Pierre I. Karakiewicz, Shahrokh F. Shariat. Lymphocyte-to-monocyte ratio and neutrophil-to-lymphocyte ratio as biomarkers for predicting lymph node metastasis and survival in patients treated with radical cystectomy. *Journal of Surgical Oncology* 2017;115(4):455-461. [DOI: 10.1002/jso.24521]

## Characteristics

|                      |                                                                                                                                                    |
|----------------------|----------------------------------------------------------------------------------------------------------------------------------------------------|
| <b>Methods</b>       | Retrospective                                                                                                                                      |
| <b>Participants</b>  | MIBC, non-metastatic disease, 4335                                                                                                                 |
| <b>Interventions</b> | Lymphocyte to monocyte ratio, Neutrophil to lymphocyte ratio                                                                                       |
| <b>Outcomes</b>      | Pathologic aggressiveness prediction (Lymph node positivity, Extravesical disease), Survival ( overall, cancer specific, recurrence free survival) |
| <b>Notes</b>         |                                                                                                                                                    |

## Risk of bias table

| Bias                                                                     | Authors' judgement | Support for judgement                                                                                                                                                                                                                   |
|--------------------------------------------------------------------------|--------------------|-----------------------------------------------------------------------------------------------------------------------------------------------------------------------------------------------------------------------------------------|
| Representativeness of the exposed cohort                                 | Low risk           | Somewhat representative                                                                                                                                                                                                                 |
| Selection of the non-exposed cohort                                      | Low risk           | Drawn from the same community as the exposed cohort                                                                                                                                                                                     |
| Ascertainment of exposure                                                | Low risk           | Secure record (Laboratory data)                                                                                                                                                                                                         |
| Demonstration that outcome of interest was not present at start of study | Low risk           | Yes                                                                                                                                                                                                                                     |
| Controls for Most importat factor                                        | Low risk           | Yes, included pathologic grade, stage and CIS                                                                                                                                                                                           |
| Study controls for any additional factor                                 | Low risk           | Yes, LVI                                                                                                                                                                                                                                |
| Assessment of outcome                                                    | Low risk           | Record linkage                                                                                                                                                                                                                          |
| Was follow-up long enough for outcomes to occur                          | Low risk           | 5 year is enough to assessing RFS, OS and CSS in MIBC patients                                                                                                                                                                          |
| Adequacy of follow up of cohorts                                         | Low risk           | Subjects lost to follow up unlikely to introduce bias- number lost less than or equal to 20% or description of those lost suggested no different from those followed 42.4 month 33.3% recurr, 46.6% deceased and 27.5% died due to UCC. |

## Results data

### *Ojerholm 2017*

## References

Eric Ojerholm, Andrew Smith, Wei-Ting Hwang, Brian C. Baumann, Kai N. Tucker, Seth P. Lerner, Ronac Mamtani, Ben Boursi, John P. Christodouleas. Neutrophil-to-lymphocyte ratio as a bladder cancer biomarker: Assessing prognostic and predictive value in SWOG 8710. *Cancer* 2017;123(5):794-801.

## Characteristics

|                      |                                                                                    |
|----------------------|------------------------------------------------------------------------------------|
| <b>Methods</b>       | Prospective cohort                                                                 |
| <b>Participants</b>  | MIBC, Radical cystectomy, 230 for prognostic analysis, 263 for predictive analysis |
| <b>Interventions</b> | pre-treatment NLR                                                                  |
| <b>Outcomes</b>      | Overall survival                                                                   |
| <b>Notes</b>         | SWOG8710                                                                           |

## Risk of bias table



| Bias                                                                     | Authors' judgement | Support for judgement                                                                                                                                                 |
|--------------------------------------------------------------------------|--------------------|-----------------------------------------------------------------------------------------------------------------------------------------------------------------------|
| Representativeness of the exposed cohort                                 | Low risk           | Somewhat representative                                                                                                                                               |
| Selection of the non-exposed cohort                                      | Low risk           | Drawn from the same community as the exposed cohort                                                                                                                   |
| Ascertainment of exposure                                                | Low risk           | Secure record                                                                                                                                                         |
| Demonstration that outcome of interest was not present at start of study | Low risk           | Yes                                                                                                                                                                   |
| Controls for Most important factor                                       | Low risk           | Yes, T stage category                                                                                                                                                 |
| Study controls for any additional factor                                 | Unclear risk       | Yes, LVI, Treatment method                                                                                                                                            |
| Assessment of outcome                                                    | Low risk           | Record linkage                                                                                                                                                        |
| Was follow-up long enough for outcomes to occur                          | Low risk           | Median follow up 18.6 years                                                                                                                                           |
| Adequacy of follow up of cohorts                                         | Low risk           | Subjects lost to follow up unlikely to introduce bias- number lost less than or equal to 20% or description of those lost suggested no different from those followed. |

## Results data

### Yoshida 2016

## References

Takashi Yoshida, Hidefumi Kinoshita, Kenji Yoshida, Takao Mishima, Masaaki Yanishi, Yoshihiro Komai, Motohiko Sugi, Takashi Murota, Gen Kawa, Tadashi Matsuda. Perioperative change in neutrophil-lymphocyte ratio predicts the overall survival of patients with bladder cancer undergoing radical cystectomy. Japanese Journal of Clinical Oncology 2016;46(12):1162-1167. [DOI: 10.1093/jjco/hyw129]

## Characteristics

|                      |                                       |
|----------------------|---------------------------------------|
| <b>Methods</b>       | Retrospective                         |
| <b>Participants</b>  | NMIBC+MIBC, Radical cystectomy, 323   |
| <b>Interventions</b> | pre-treatment NLR, post-treatment NLR |
| <b>Outcomes</b>      | 5-year overall survival               |
| <b>Notes</b>         |                                       |

## Risk of bias table

| Bias                                                                     | Authors' judgement | Support for judgement                                                                                                                                                 |
|--------------------------------------------------------------------------|--------------------|-----------------------------------------------------------------------------------------------------------------------------------------------------------------------|
| Representativeness of the exposed cohort                                 | Low risk           | Somewhat representative                                                                                                                                               |
| Selection of the non-exposed cohort                                      | Low risk           | Drawn from the same community as the exposed cohort                                                                                                                   |
| Ascertainment of exposure                                                | Low risk           | Secure record                                                                                                                                                         |
| Demonstration that outcome of interest was not present at start of study | Low risk           | Yes                                                                                                                                                                   |
| Controls for Most important factor                                       | Low risk           | Yes, Pathologic T stage and N stage                                                                                                                                   |
| Study controls for any additional factor                                 | Low risk           | Yes, included Tumor grade, LVI, PSM and adj + neo adj chemotherapy                                                                                                    |
| Assessment of outcome                                                    | Low risk           | Record linkage                                                                                                                                                        |
| Was follow-up long enough for outcomes to occur                          | Low risk           | 5 year is enough to assess OS in MIBC                                                                                                                                 |
| Adequacy of follow up of cohorts                                         | Low risk           | Subjects lost to follow up unlikely to introduce bias- number lost less than or equal to 20% or description of those lost suggested no different from those followed. |

## Results data

### **Buisan 2017**

## References

Oscar Buisan, Anna Orsola, Joan Areal, Albert Font, Mario Oliveira, Roberto Martinez, Luis Ibarz. Low Pretreatment Neutrophil-to-Lymphocyte Ratio Predicts for Good Outcomes in Patients Receiving Neoadjuvant Chemotherapy Before Radical Cystectomy for Muscle Invasive Bladder Cancer.. *Clinical Genitourinary Cancer* 2017;15(1):145-151. [DOI: 10.1016/j.clgc.2016.05.004]

## Characteristics

|                      |                                                                                                                                |
|----------------------|--------------------------------------------------------------------------------------------------------------------------------|
| <b>Methods</b>       | Retrospective                                                                                                                  |
| <b>Participants</b>  | Neoadjuvant chemotherapy+Radical cystectomy, MIBC, 205 patient                                                                 |
| <b>Interventions</b> | pre-treatment NLR level (>2.5)                                                                                                 |
| <b>Outcomes</b>      | Pathologic response (downstaging), 5 year progression free survival, 5 year cancer specific survival, 5 year overall survival, |
| <b>Notes</b>         |                                                                                                                                |

## Risk of bias table

| Bias                                                                     | Authors' judgement | Support for judgement                                        |
|--------------------------------------------------------------------------|--------------------|--------------------------------------------------------------|
| Representativeness of the exposed cohort                                 | Low risk           | Somewhat representative                                      |
| Selection of the non-exposed cohort                                      | Low risk           | Drawn from the same community as the exposed cohort          |
| Ascertainment of exposure                                                | Low risk           | Secure record                                                |
| Demonstration that outcome of interest was not present at start of study | Low risk           | Yes                                                          |
| Controls for Most important factor                                       | Low risk           | Yes, Included pT stage and pN stage                          |
| Study controls for any additional factor                                 | Low risk           | Yes, extracted LN,                                           |
| Assessment of outcome                                                    | Low risk           | Record linkage                                               |
| Was follow-up long enough for outcomes to occur                          | Low risk           | 5 Year is enough to assessing PFS, CSS, OS for MIBC patients |
| Adequacy of follow up of cohorts                                         | Low risk           | 31 months, but various follow up period                      |

## Results data

### *Morizawa 2016*

## References

Yosuke Morizawa, Makito Miyake, Keiji Shimada, Shunta Hori, Yoshihiro Tatsumi, Yasushi Nakai, Satoshi Anai, Nobumichi Tanaka, Noboru Konishi, Kiyohide Fujimoto. Neutrophil-to-lymphocyte ratio as a detection marker of tumor recurrence in patients with muscle-invasive bladder cancer after radical cystectomy. Urologic Oncology 2016;34(6):257.e11-257.e17.

## Characteristics

|                      |                                                                                           |
|----------------------|-------------------------------------------------------------------------------------------|
| <b>Methods</b>       | Retrospective                                                                             |
| <b>Participants</b>  | MIBC, Radical cystectomy, 110                                                             |
| <b>Interventions</b> | pre-operative NLR ( $\geq 2.6$ )                                                          |
| <b>Outcomes</b>      | 5-year Recurrence free survival, 5-year Cancer specific survival, 5-year Overall survival |
| <b>Notes</b>         |                                                                                           |

## Risk of bias table

| Bias                                     | Authors' judgement | Support for judgement                               |
|------------------------------------------|--------------------|-----------------------------------------------------|
| Representativeness of the exposed cohort | Low risk           | Somewhat representative                             |
| Selection of the non-exposed cohort      | Low risk           | Drawn from the same community as the exposed cohort |

|                                                                          |              |                                                                   |
|--------------------------------------------------------------------------|--------------|-------------------------------------------------------------------|
| Ascertainment of exposure                                                | Low risk     | Secure record                                                     |
| Demonstration that outcome of interest was not present at start of study | Low risk     | Yes                                                               |
| Controls for Most important factor                                       | Low risk     | Yes, Pathologic T stage                                           |
| Study controls for any additional factor                                 | Low risk     | Yes, Histologic subtype, LN positivity, PSM                       |
| Assessment of outcome                                                    | Low risk     | Record linkage                                                    |
| Was follow-up long enough for outcomes to occur                          | Low risk     | 5 Year is enough to assessing PFS, CSS, OS for MIBC patients      |
| Adequacy of follow up of cohorts                                         | Unclear risk | No statement, but median follow-up is too short in high NLR group |

## Results data

### *Kawahara 2016*

## References

Takashi Kawahara, Kazuhiro Furuya, Manami Nakamura, Kentaro Sakamaki, Kimito Osaka, Hiroki Ito, Yusuke Ito, Koji Izumi, Shinji Ohtake, Yasuhide Miyoshi, Kazuhide Makiyama, Noboru Nakaigawa, Takeharu Yamanaka, Hiroshi Miyamoto<sup>4</sup>, Masahiro Yao, Hiroji Uemura. Neutrophil-to-lymphocyte ratio is a prognostic marker in bladder cancer patients after radical cystectomy. BMC Cancer 2016;16(1):1-8. [DOI: 10.1186/s12885-016-2219-z]

## Characteristics

|                      |                                                                                    |
|----------------------|------------------------------------------------------------------------------------|
| <b>Methods</b>       | Retrospective                                                                      |
| <b>Participants</b>  | Radical cystectomy, 74 patients                                                    |
| <b>Interventions</b> | Pretreatment NLR level ( $\geq 2.38$ )                                             |
| <b>Outcomes</b>      | Overall survival, Progression free survival, Pathologic infiltration of Lymphocyte |
| <b>Notes</b>         |                                                                                    |

## Risk of bias table

| Bias                                                                     | Authors' judgement | Support for judgement                               |
|--------------------------------------------------------------------------|--------------------|-----------------------------------------------------|
| Representativeness of the exposed cohort                                 | Low risk           | Somewhat representative                             |
| Selection of the non-exposed cohort                                      | Low risk           | Drawn from the same community as the exposed cohort |
| Ascertainment of exposure                                                | Low risk           | Secure record (laboratory results)                  |
| Demonstration that outcome of interest was not present at start of study | Low risk           | Yes                                                 |
| Controls for Most important factor                                       | Low risk           | Yes, Pathologic T and N stage                       |

|                                                 |              |                                                                                   |
|-------------------------------------------------|--------------|-----------------------------------------------------------------------------------|
| Study controls for any additional factor        | Low risk     | Yes, NAC, Neoadjuvant therapy,                                                    |
| Assessment of outcome                           | Low risk     | Record linkage                                                                    |
| Was follow-up long enough for outcomes to occur | High risk    | No, 24.2 and 29.6 months of follow-up was too short to assessing clinical outcome |
| Adequacy of follow up of cohorts                | Unclear risk | No statement                                                                      |

## Results data

### *Bhindi 2016*

## References

Bimal Bhindi, Thomas Hermanns, Yanliang Wei, Julie Yu, Patrick O Richard, Marian S Wettstein, Arnoud Templeton, Kathy Li, Srikala S Sridhar, Michael A S Jewett, Neil E Fleshner, Alexandre R Zlotta, Girish S Kulkarni. Identification of the best complete blood count-based predictors for bladder cancer outcomes in patients undergoing radical cystectomy. British Journal of Cancer 2016;114(2):207-212. [DOI: 10.1038/bjc.2015.432]

## Characteristics

|                      |                                                                      |
|----------------------|----------------------------------------------------------------------|
| <b>Methods</b>       | Retrospective                                                        |
| <b>Participants</b>  | Radical cystectomy, 418 patients                                     |
| <b>Interventions</b> | pre-treatment NLR, and other CBC based biomarkers                    |
| <b>Outcomes</b>      | Recurrence free survival, Cancer specific survival, Overall survival |
| <b>Notes</b>         |                                                                      |

## Risk of bias table

| Bias                                                                     | Authors' judgement | Support for judgement                               |
|--------------------------------------------------------------------------|--------------------|-----------------------------------------------------|
| Representativeness of the exposed cohort                                 | Low risk           | Somewhat representative                             |
| Selection of the non-exposed cohort                                      | Low risk           | Drawn from the same community as the exposed cohort |
| Ascertainment of exposure                                                | Low risk           | Secure record (laboratory results)                  |
| Demonstration that outcome of interest was not present at start of study | Low risk           | Yes                                                 |
| Controls for Most important factor                                       | Low risk           | Yes, pathologic T stage, N stage                    |
| Study controls for any additional factor                                 | Low risk           | Yes, LVI and PSM                                    |
| Assessment of outcome                                                    | Low risk           | Record linkage                                      |

|                                                 |              |                                                                                                                                                                     |
|-------------------------------------------------|--------------|---------------------------------------------------------------------------------------------------------------------------------------------------------------------|
| Was follow-up long enough for outcomes to occur | Low risk     | Median follow up was 40 months (14-72)                                                                                                                              |
| Adequacy of follow up of cohorts                | Unclear risk | Subjects lost to follow up unlikely to introduce bias-number lost less than or equal to 20% or description of those lost suggested no different from those followed |

## Results data

### Ozcan 2015

## References

Cihat Ozcan, Onur Telli, Erdem Ozturk, Evren Suer, Mehmet Ilker Gokce, Omer Gulpinar, Derya Oztuna, Sumer Baltaci, Cagatay Gogus. The prognostic significance of preoperative leukocytosis and neutrophil-to-lymphocyte ratio in patients who underwent radical cystectomy for bladder cancer. *Journal of the Canadian Urological Association* 2015;9(11):E789-E794. [DOI: 10.5489/cuaj.3061]

## Characteristics

|                      |                                 |
|----------------------|---------------------------------|
| <b>Methods</b>       | Retrospective                   |
| <b>Participants</b>  | Radical cystectomy, 286         |
| <b>Interventions</b> | Preoperative NLR,               |
| <b>Outcomes</b>      | Disease specific survival (CSS) |
| <b>Notes</b>         |                                 |

## Risk of bias table

| Bias                                                                     | Authors' judgement | Support for judgement                                         |
|--------------------------------------------------------------------------|--------------------|---------------------------------------------------------------|
| Representativeness of the exposed cohort                                 | Low risk           | Somewhat representative                                       |
| Selection of the non-exposed cohort                                      | Low risk           | Drawn from the same community as the exposed cohort           |
| Ascertainment of exposure                                                | Low risk           | Secure record                                                 |
| Demonstration that outcome of interest was not present at start of study | Low risk           | Yes                                                           |
| Controls for Most important factor                                       | Low risk           | Yes, included Pathologic stage, N stage                       |
| Study controls for any additional factor                                 | Low risk           | Yes. Included PSM, tumor grade, CIS                           |
| Assessment of outcome                                                    | Low risk           | Record linkage                                                |
| Was follow-up long enough for outcomes to occur                          | Unclear risk       | 28 months (0-144), Unclear defined follow up period.          |
| Adequacy of follow up of cohorts                                         | High risk          | Follow up rate less than 80% and no description of those lost |

## Results data

**Seah 2015**

## References

Jo-An Seah, Raya Leibowitz-Amit, Eshetu G. Atenafu, Nimira Alimohamed, Jennifer J. Knox, Anthony M. Joshua, Srikala S. Sridhar. Neutrophil-Lymphocyte Ratio and Pathological Response to Neoadjuvant Chemotherapy in Patients with Muscle-Invasive Bladder Cancer. *Clinical Genitourinary Cancer* 2015;13(4):e229-e233.

## Characteristics

|                      |                                                    |
|----------------------|----------------------------------------------------|
| <b>Methods</b>       | Retrospective                                      |
| <b>Participants</b>  | Radical cystectomy + Neoadjuvant chemotherapy , 26 |
| <b>Interventions</b> | NLR level at the pre, mid, and post of treatment   |
| <b>Outcomes</b>      | Pathologic Response                                |
| <b>Notes</b>         |                                                    |

## Risk of bias table

| <b>Bias</b>                                                              | <b>Authors' judgement</b> | <b>Support for judgement</b>                                   |
|--------------------------------------------------------------------------|---------------------------|----------------------------------------------------------------|
| Representativeness of the exposed cohort                                 | Low risk                  | Somewhat representative                                        |
| Selection of the non-exposed cohort                                      | Low risk                  | Drawn from the same community as the exposed cohort            |
| Ascertainment of exposure                                                | Low risk                  | Secure record (laboratory results)                             |
| Demonstration that outcome of interest was not present at start of study | Low risk                  | Yes                                                            |
| Controls for Most important factor                                       | Low risk                  | Yes, pathologic T stage, N stage                               |
| Study controls for any additional factor                                 | Low risk                  | Yes, Histology, Chemotx cycle and interval from NAC to surgery |
| Assessment of outcome                                                    | Low risk                  | Independent blind assessment                                   |
| Was follow-up long enough for outcomes to occur                          | Low risk                  | Yes, There are no need to follow up period for this study      |
| Adequacy of follow up of cohorts                                         | Low risk                  | Yes                                                            |

## Results data

**Ku 2015**

## References

Ja Hyun Ku, Myeon Kang, Hyung Suk Kim, Chang Wook Jeong, Cheol Kwak, Hyeon Hoe Kim. The prognostic value of pretreatment of systemic inflammatory responses in patients with urothelial carcinoma undergoing radical cystectomy. *British Journal of Cancer* 2015;112(3):461-467.

## Characteristics

|                      |                                                    |
|----------------------|----------------------------------------------------|
| <b>Methods</b>       | Retrospective                                      |
| <b>Participants</b>  | Radical cystectomy, 419                            |
| <b>Interventions</b> | pretreatment NLR, Systemic inflammatory response   |
| <b>Outcomes</b>      | 5-year disease specific survival, overall survival |
| <b>Notes</b>         |                                                    |

## Risk of bias table

| <b>Bias</b>                                                              | <b>Authors' judgement</b> | <b>Support for judgement</b>                                                                                                                                          |
|--------------------------------------------------------------------------|---------------------------|-----------------------------------------------------------------------------------------------------------------------------------------------------------------------|
| Representativeness of the exposed cohort                                 | Low risk                  | Somewhat representative                                                                                                                                               |
| Selection of the non-exposed cohort                                      | Low risk                  | Drawn from the same community as the exposed cohort                                                                                                                   |
| Ascertainment of exposure                                                | Low risk                  | Secure record (laboratory result)                                                                                                                                     |
| Demonstration that outcome of interest was not present at start of study | Low risk                  | Yes                                                                                                                                                                   |
| Controls for Most important factor                                       | Low risk                  | Yes, Included pathologic T, N stage                                                                                                                                   |
| Study controls for any additional factor                                 | Low risk                  | Yes, PSM, LVI                                                                                                                                                         |
| Assessment of outcome                                                    | Low risk                  | Record linkage                                                                                                                                                        |
| Was follow-up long enough for outcomes to occur                          | Low risk                  | Yes, 5-years                                                                                                                                                          |
| Adequacy of follow up of cohorts                                         | Low risk                  | Subjects lost to follow up unlikely to introduce bias- number lost less than or equal to 20% or description of those lost suggested no different from those followed. |

## Results data

### Viers 2014

## References

Boyd R. Viers, Stephen A. Boorjian, Igor Frank, Robert F. Tarrell, Prabin Thapa, R. Jeffrey Karnes, R. Houston Thompson, Matthew K. Tollefson. Pretreatment neutrophil-to-lymphocyte ratio is associated with advanced



pathologic tumor stage and increased cancer-specific mortality among patients with urothelial carcinoma of the bladder undergoing radical cystectomy. *European Urology* 2014;66(6):1157-1164.

## Characteristics

|                      |                                                                             |
|----------------------|-----------------------------------------------------------------------------|
| <b>Methods</b>       | Retrospective                                                               |
| <b>Participants</b>  | Radical cystectomy, without NAC, 899                                        |
| <b>Interventions</b> | pretreatment NLR (within 90d before RC) > 2.7                               |
| <b>Outcomes</b>      | 5 year cancer specific survival, overall survival, recurrence free survival |
| <b>Notes</b>         |                                                                             |

## Risk of bias table

| <b>Bias</b>                                                              | <b>Authors' judgement</b> | <b>Support for judgement</b>                                                                                                                                          |
|--------------------------------------------------------------------------|---------------------------|-----------------------------------------------------------------------------------------------------------------------------------------------------------------------|
| Representativeness of the exposed cohort                                 | Low risk                  | Somewhat representative                                                                                                                                               |
| Selection of the non-exposed cohort                                      | Low risk                  | Drawn from the same community as the exposed cohort                                                                                                                   |
| Ascertainment of exposure                                                | Low risk                  | Secure record                                                                                                                                                         |
| Demonstration that outcome of interest was not present at start of study | Low risk                  | Yes                                                                                                                                                                   |
| Controls for Most important factor                                       | Low risk                  | Yes, Pathologic T, N stage                                                                                                                                            |
| Study controls for any additional factor                                 | Low risk                  | Yes, Tumor size, Positive margin, ADJ therapy, LN density                                                                                                             |
| Assessment of outcome                                                    | Low risk                  | Record linkage                                                                                                                                                        |
| Was follow-up long enough for outcomes to occur                          | Low risk                  | Yes for 5 - year                                                                                                                                                      |
| Adequacy of follow up of cohorts                                         | Low risk                  | Subjects lost to follow up unlikely to introduce bias- number lost less than or equal to 20% or description of those lost suggested no different from those followed. |

## Results data

### Potretzke 2014

## References

Aaron Potretzke, Luke Hillman, Kelvin Wong, Fangfang Shi, Ryan Brower, Stephanie Mai, Jeremy P. Cetnar, Edwin Jason Abel, Tracy M. Downs. NLR is predictive of upstaging at the time of radical cystectomy for patients with urothelial carcinoma of the bladder. *Urologic Oncology* 2014;32(5):631-636.

## Characteristics

|                      |                                                           |
|----------------------|-----------------------------------------------------------|
| <b>Methods</b>       | Retrospective                                             |
| <b>Participants</b>  | Radical cystectomy, 102                                   |
| <b>Interventions</b> | pre-treatment NLR (within 100 days before surgery)        |
| <b>Outcomes</b>      | Pathologic upstage (Organ confined to non-organ confined) |
| <b>Notes</b>         |                                                           |

## Risk of bias table

| Bias                                                                     | Authors' judgement | Support for judgement                                     |
|--------------------------------------------------------------------------|--------------------|-----------------------------------------------------------|
| Representativeness of the exposed cohort                                 | Low risk           | Somewhat representative                                   |
| Selection of the non-exposed cohort                                      | Low risk           | Drawn from the same community as the exposed cohort       |
| Ascertainment of exposure                                                | Low risk           | Secure record                                             |
| Demonstration that outcome of interest was not present at start of study | Low risk           | Yes                                                       |
| Controls for Most important factor                                       | Low risk           | Yes, Pre-operative stage, CIs, LVI                        |
| Study controls for any additional factor                                 | Low risk           | Yes, Grade, CIS                                           |
| Assessment of outcome                                                    | Low risk           | Record linkage                                            |
| Was follow-up long enough for outcomes to occur                          | Low risk           | Yes, There are no need to follow up period for this study |
| Adequacy of follow up of cohorts                                         | Low risk           | Yes                                                       |

## Results data

### *Krane 2013*

## References

L. Spencer Krane, Kyle A. Richards, A. Karim Kader, Ronald Davis, K.C. Balaji, Ashok K. Hemal. Preoperative Neutrophil/Lymphocyte Ratio Predicts Overall Survival and Extravesical Disease in Patients Undergoing Radical Cystectomy. *Journal of Endourology* 2013;27(8):1046-1050.

## Characteristics

|                      |                                            |
|----------------------|--------------------------------------------|
| <b>Methods</b>       | Retrospective                              |
| <b>Participants</b>  | Radical cystectomy, 68                     |
| <b>Interventions</b> | pre-treatment NLR $\geq$ 2.5               |
| <b>Outcomes</b>      | Overall survival, Cancer specific survival |

## Notes

## Risk of bias table

| Bias                                                                     | Authors' judgement | Support for judgement                                                                                                                                                |
|--------------------------------------------------------------------------|--------------------|----------------------------------------------------------------------------------------------------------------------------------------------------------------------|
| Representativeness of the exposed cohort                                 | Low risk           | Somewhat representative                                                                                                                                              |
| Selection of the non-exposed cohort                                      | Low risk           | Drawn from the same community as the exposed cohort                                                                                                                  |
| Ascertainment of exposure                                                | Low risk           | Secure record                                                                                                                                                        |
| Demonstration that outcome of interest was not present at start of study | Low risk           | Yes                                                                                                                                                                  |
| Controls for Most importat factor                                        | Low risk           | Yes, , pathologic T and N stage                                                                                                                                      |
| Study controls for any additional factor                                 | Low risk           | Yes, Operation method, DM and other findings                                                                                                                         |
| Assessment of outcome                                                    | Low risk           | Record linkage                                                                                                                                                       |
| Was follow-up long enough for outcomes to occur                          | Unclear risk       | Too short. 25 months, (13–61)                                                                                                                                        |
| Adequacy of follow up of cohorts                                         | Low risk           | Subjects lost to follow up unlikely to introduce bias- number lost less than or equal to 20% or description of those lost suggested no different from those followed |

## Results data

**Gondo 2012**

## References

Tatsuo Gondo, Jun Nakashima, Yoshio Ohno, Ozu Choichiro, Yutaka Horiguchi, Kazunori Namiki, Kunihiro Yoshioka, Makoto Ohori, Tadashi Hatano, and Masaaki Tachibana. Prognostic value of neutrophil-to-lymphocyte ratio and establishment of novel preoperative risk stratification model in bladder cancer patients treated with radical cystectomy. *Urology* 2012;79(5):1085-1091. [DOI: 10.1016/j.urology.2011.11.070]

## Characteristics

|                      |                                              |
|----------------------|----------------------------------------------|
| <b>Methods</b>       | Retrospective                                |
| <b>Participants</b>  | Radical cystectomy, 189                      |
| <b>Interventions</b> | pre-treatment NLR                            |
| <b>Outcomes</b>      | One, 3 year, 5 year cancer specific survival |
| <b>Notes</b>         |                                              |

## Risk of bias table

| Bias                                                                     | Authors' judgement | Support for judgement                                                                                                                                                 |
|--------------------------------------------------------------------------|--------------------|-----------------------------------------------------------------------------------------------------------------------------------------------------------------------|
| Representativeness of the exposed cohort                                 | Low risk           | Somewhat representative                                                                                                                                               |
| Selection of the non-exposed cohort                                      | Low risk           | Drawn from the same community as the exposed cohort                                                                                                                   |
| Ascertainment of exposure                                                | Low risk           | Secure record                                                                                                                                                         |
| Demonstration that outcome of interest was not present at start of study | Low risk           | Yes                                                                                                                                                                   |
| Controls for Most important factor                                       | High risk          | No. no pathologic stage                                                                                                                                               |
| Study controls for any additional factor                                 | Low risk           | Clinical stage, Tumor size, Tumor number, Grade                                                                                                                       |
| Assessment of outcome                                                    | Low risk           | Record linkage                                                                                                                                                        |
| Was follow-up long enough for outcomes to occur                          | Low risk           | Yes                                                                                                                                                                   |
| Adequacy of follow up of cohorts                                         | Low risk           | Subjects lost to follow up unlikely to introduce bias- number lost less than or equal to 20% or description of those lost suggested no different from those followed. |

## Results data

**Nguyen 2016**

## References

Daniel P. Nguyen, Bashir Al Hussein Al Awamlh, Padraic O'Malley, Farehin Khan, Patrick J. E., Lewicki David M. Golombos, Douglas S. Scherr. Factors Impacting the Occurrence of Local, Distant and Atypical Recurrences after Robot-Assisted Radical Cystectomy: A Detailed Analysis of 310 Patients. *Journal of Urology* 2016;196(5):1390-1396.

## Characteristics

|                      |                                                              |
|----------------------|--------------------------------------------------------------|
| <b>Methods</b>       | Retrospective                                                |
| <b>Participants</b>  | Robot, Radical cystectomy, 310 patients                      |
| <b>Interventions</b> | pre-operative NLR                                            |
| <b>Outcomes</b>      | Recurrence free survival (Local isolated, Distant, Atypical) |
| <b>Notes</b>         |                                                              |

## Risk of bias table

| Bias                                                                     | Authors' judgement | Support for judgement                                                                   |
|--------------------------------------------------------------------------|--------------------|-----------------------------------------------------------------------------------------|
| Representativeness of the exposed cohort                                 | Low risk           | Somewhat representative                                                                 |
| Selection of the non-exposed cohort                                      | Low risk           | Drawn from the same community as the exposed cohort                                     |
| Ascertainment of exposure                                                | Low risk           | Secure record                                                                           |
| Demonstration that outcome of interest was not present at start of study | Low risk           | Yes                                                                                     |
| Controls for Most important factor                                       | Low risk           | Yes, Pathologic T, N stage                                                              |
| Study controls for any additional factor                                 | Low risk           | Yes, LVI, CIS                                                                           |
| Assessment of outcome                                                    | Low risk           | Record linkage                                                                          |
| Was follow-up long enough for outcomes to occur                          | Unclear risk       | 2-3 year of recurrence free survival? Short follow up periods (Mean follow up 24 month) |
| Adequacy of follow up of cohorts                                         | Unclear risk       | Follow up rate less than 80% and no description of those lost (189 patients analysis)   |

## Results data

**Sonpavde 2016**

## References

Guru Sonpavde, Gregory R. Pond, Jonathan E. Rosenberg, Dean F. Bajorin, Toni K. Choueiri, Andrea Necchi, Giuseppe Di Lorenzo, Joaquim Bellmunt. Improved 5-Factor Prognostic Classification of Patients Receiving Salvage Systemic Therapy for Advanced Urothelial Carcinoma. *Journal of Urology* 2015;195(OCT):277-282. [DOI: 10.1016/j.juro.2015.07.111]

## Characteristics

|                      |                                        |
|----------------------|----------------------------------------|
| <b>Methods</b>       | Retrospective                          |
| <b>Participants</b>  | Salvage systemic therapy, 708 patients |
| <b>Interventions</b> | pre-treatment NLR                      |
| <b>Outcomes</b>      | Overall survival                       |
| <b>Notes</b>         |                                        |

## Risk of bias table

| Bias                                                                     | Authors' judgement | Support for judgement                                                                                                                                                 |
|--------------------------------------------------------------------------|--------------------|-----------------------------------------------------------------------------------------------------------------------------------------------------------------------|
| Representativeness of the exposed cohort                                 | Low risk           | Somewhat representative                                                                                                                                               |
| Selection of the non-exposed cohort                                      | Low risk           | Drawn from the same community as the exposed cohort                                                                                                                   |
| Ascertainment of exposure                                                | Low risk           | Secure record                                                                                                                                                         |
| Demonstration that outcome of interest was not present at start of study | Low risk           | Yes                                                                                                                                                                   |
| Controls for Most important factor                                       | Unclear risk       | No clinical stage information.                                                                                                                                        |
| Study controls for any additional factor                                 | Low risk           | ECOG-PS                                                                                                                                                               |
| Assessment of outcome                                                    | Low risk           | Record linkage                                                                                                                                                        |
| Was follow-up long enough for outcomes to occur                          | Low risk           | Yes                                                                                                                                                                   |
| Adequacy of follow up of cohorts                                         | Low risk           | Subjects lost to follow up unlikely to introduce bias- number lost less than or equal to 20% or description of those lost suggested no different from those followed. |

## Results data

### *Taguchi 2015*

## References

Satoru Taguchi, Tohru Nakagawa, Akihiko Matsumoto, Yasushi Nagase, Taketo Kawai, Yoshinori Tanaka, Kanae Yoshida, Sachi Yamamoto, Yutaka Enomoto, Yorito Nose, Toshikazu Sato, Akira Ishikawa, Yukari Uemura, Tetsuya Fujimura, Hiroshi Fukuhara, Haruki Kume, Yukio Homma. Pretreatment neutrophil-to-lymphocyte ratio as an independent predictor of survival in patients with metastatic urothelial carcinoma: A multi-institutional study. International Journal of Urology 2015;22(7):638-643. [DOI: 10.1111/iju.12766]

## Characteristics

|                      |                                      |
|----------------------|--------------------------------------|
| <b>Methods</b>       | Retrospective                        |
| <b>Participants</b>  | Salvage chemotherapy, 185            |
| <b>Interventions</b> | pre-treatment NLR $\geq 3$ , ECOG-PS |
| <b>Outcomes</b>      | Overall-survival                     |
| <b>Notes</b>         |                                      |

## Risk of bias table

| Bias                                                                     | Authors' judgement | Support for judgement                                                                                                                                                |
|--------------------------------------------------------------------------|--------------------|----------------------------------------------------------------------------------------------------------------------------------------------------------------------|
| Representativeness of the exposed cohort                                 | Low risk           | Somewhat representative                                                                                                                                              |
| Selection of the non-exposed cohort                                      | Low risk           | Drawn from the same community as the exposed cohort                                                                                                                  |
| Ascertainment of exposure                                                | Low risk           | Secure record                                                                                                                                                        |
| Demonstration that outcome of interest was not present at start of study | Low risk           | Yes                                                                                                                                                                  |
| Controls for Most important factor                                       | Low risk           | Yes, Clinical stage, metastasis information                                                                                                                          |
| Study controls for any additional factor                                 | Low risk           | Yes, Chemotherapy agent, ECOG-PS                                                                                                                                     |
| Assessment of outcome                                                    | Low risk           | Yes                                                                                                                                                                  |
| Was follow-up long enough for outcomes to occur                          | Low risk           | 13.0 months (7.0-25.5)                                                                                                                                               |
| Adequacy of follow up of cohorts                                         | Low risk           | Subjects lost to follow up unlikely to introduce bias-number lost less than or equal to 20% or description of those lost suggested no different from those followed. |

## Results data

**Rossi 2015**

## References

Lorena Rossi, Matteo Santoni, Simon J. Crabb, Emanuela Scarpi, Luciano Burattini, Caroline Chau, Emanuela Bianchi, Agnese Savini, Salvatore L. Burgio, Alessandro Conti, Vincenza Conteduca, Stefano Cascinu, Ugo De Giorgi. High Neutrophil-to-lymphocyte Ratio Persistent During First-line Chemotherapy Predicts Poor Clinical Outcome in Patients with Advanced Urothelial Cancer. *Annals of Surgical Oncology* 2015;22(4):1377-1384. [DOI: 10.1245/s10434-014-4097-4]

## Characteristics

|                      |                                                                                |
|----------------------|--------------------------------------------------------------------------------|
| <b>Methods</b>       | Retrospective                                                                  |
| <b>Participants</b>  | First-line chemotherapy, unresectable and metastatic Urothelial carcinoma. 292 |
| <b>Interventions</b> | pre-treatment NLR $\geq 3$ , ECOG-PS, Visceral disease, Hb                     |
| <b>Outcomes</b>      | Progression free survival, Overall survival                                    |
| <b>Notes</b>         |                                                                                |

## Risk of bias table

| Bias                                                                     | Authors' judgement | Support for judgement                                                                                                                                                |
|--------------------------------------------------------------------------|--------------------|----------------------------------------------------------------------------------------------------------------------------------------------------------------------|
| Representativeness of the exposed cohort                                 | Low risk           | Somewhat representative                                                                                                                                              |
| Selection of the non-exposed cohort                                      | Low risk           | Drawn from the same community as the exposed cohort                                                                                                                  |
| Ascertainment of exposure                                                | Low risk           | Secure record                                                                                                                                                        |
| Demonstration that outcome of interest was not present at start of study | Low risk           | Yes                                                                                                                                                                  |
| Controls for Most important factor                                       | Low risk           | Yes, Stage                                                                                                                                                           |
| Study controls for any additional factor                                 | Low risk           | Yes, ECOG-PS                                                                                                                                                         |
| Assessment of outcome                                                    | Low risk           | Record linkage                                                                                                                                                       |
| Was follow-up long enough for outcomes to occur                          | Low risk           | Yes                                                                                                                                                                  |
| Adequacy of follow up of cohorts                                         | Low risk           | Subjects lost to follow up unlikely to introduce bias-number lost less than or equal to 20% or description of those lost suggested no different from those followed. |

## Results data

**Auvray 2016**

## References

Marie Auvray, Reza Elaidi, Mustafa Ozguroglu, Sermin Guven, Hélène Gauthier, Stéphane Culine, Armelle Caty, Charlotte Dujardin, Edouard Auclin, Constance Thibaut, Pierre Combe, Eric Tartour, Stéphane Oudard. Prognostic Value of Baseline Neutrophil-to-Lymphocyte Ratio in Metastatic Urothelial Carcinoma Patients Treated With First-line Chemotherapy: A Large Multicenter Study. *Clinical Genitourinary Cancer* 2017;15(3):e469-e476. [DOI: 10.1016/j.clgc.2016.10.013]

## Characteristics

|                      |                                                               |
|----------------------|---------------------------------------------------------------|
| <b>Methods</b>       | Retrospective                                                 |
| <b>Participants</b>  | First-line chemotherapy, metastatic urothelial carcinoma, 280 |
| <b>Interventions</b> | pre-treatment NLR                                             |
| <b>Outcomes</b>      | Overall survival, Progression free survival                   |
| <b>Notes</b>         |                                                               |



## Risk of bias table

| Bias                                                                     | Authors' judgement | Support for judgement                                                                                                                                                 |
|--------------------------------------------------------------------------|--------------------|-----------------------------------------------------------------------------------------------------------------------------------------------------------------------|
| Representativeness of the exposed cohort                                 | Low risk           | Somewhat representative                                                                                                                                               |
| Selection of the non-exposed cohort                                      | Low risk           | Drawn from the same community as the exposed cohort                                                                                                                   |
| Ascertainment of exposure                                                | Low risk           | Secure record                                                                                                                                                         |
| Demonstration that outcome of interest was not present at start of study | Low risk           | Yes                                                                                                                                                                   |
| Controls for Most important factor                                       | Low risk           | T stage, Grade, metastasis lesion                                                                                                                                     |
| Study controls for any additional factor                                 | Low risk           | Histology, previous tx information, Chemotherapy agent                                                                                                                |
| Assessment of outcome                                                    | Low risk           | Record linkage                                                                                                                                                        |
| Was follow-up long enough for outcomes to occur                          | Low risk           | Yes                                                                                                                                                                   |
| Adequacy of follow up of cohorts                                         | Low risk           | Subjects lost to follow up unlikely to introduce bias- number lost less than or equal to 20% or description of those lost suggested no different from those followed. |

## Results data

**Su 2017**

## References

Yu-Li Su, Meng-Che Hsieh, Po-Hui Chiang, Ming-Tse Sung, Jui Lan, Hao-Lun Luo, Chun-Chieh Huang, Cheng-Hua Huang, Yeh Tang, Kun-Ming Rau. Novel inflammation-based prognostic score for predicting survival in patients with metastatic urothelial carcinoma. PLOS One 2017;12(1):1-12. [DOI: 10.1371/journal.pone.0169657]

## Characteristics

|                      |                                      |
|----------------------|--------------------------------------|
| <b>Methods</b>       | Retrospective                        |
| <b>Participants</b>  | Metastatic Urothelial carcinoma, 256 |
| <b>Interventions</b> | pre-treatment NLR $\geq$ 3.0         |
| <b>Outcomes</b>      | Overall survival                     |
| <b>Notes</b>         |                                      |

## Risk of bias table

| Bias                                                                     | Authors' judgement | Support for judgement                               |
|--------------------------------------------------------------------------|--------------------|-----------------------------------------------------|
| Representativeness of the exposed cohort                                 | Low risk           | Somewhat representative                             |
| Selection of the non-exposed cohort                                      | Low risk           | Drawn from the same community as the exposed cohort |
| Ascertainment of exposure                                                | Low risk           | Secure record                                       |
| Demonstration that outcome of interest was not present at start of study | Low risk           | Yes                                                 |
| Controls for Most important factor                                       | Low risk           | ECOG-PS,                                            |
| Study controls for any additional factor                                 | Low risk           | Metastatic site, Chemoagent, Histologic variant     |
| Assessment of outcome                                                    | Low risk           | Record linkage                                      |
| Was follow-up long enough for outcomes to occur                          | Low risk           | Yes                                                 |
| Adequacy of follow up of cohorts                                         | Low risk           | Complete follow up- all subject accounted for       |

## Results data

**Vartolomei 2017**

## References

Mihai Dorin Vartolomei, Romain Mathieu, Vitaly Margulis, Jose A. Karam, Morgan Rouprêt, Ilaria Lucca, Aurélie Mbeutcha, Christian Seitz, Pierre I. Karakiewicz, Harun Fajkovic, Christopher G. Wood, Alon Z. Weizer, Jay D. Raman, Nathalie Rioux-Leclercq, Andrea Haitel, Karim Bensalah, Michael Rink, Alberto Briganti, Evangelos Xylinas, Shahrokh F. Shariat. Promising role of preoperative neutrophil-to-lymphocyte ratio in patients treated with radical nephroureterectomy. World Journal of Urology 2017;35(1):121-130. [DOI: 10.1007/s00345-016-1848-9]

## Characteristics

|                      |                                                           |
|----------------------|-----------------------------------------------------------|
| <b>Methods</b>       | Retrospective                                             |
| <b>Participants</b>  | Radical Nephroureterectomy, 2477                          |
| <b>Interventions</b> | pre-treatment NLR $\geq 2.7$                              |
| <b>Outcomes</b>      | 3 year Refurrence free survival, Cancer specific survival |
| <b>Notes</b>         |                                                           |

## Risk of bias table

| Bias                                                                     | Authors' judgement | Support for judgement                                                                                                                                                |
|--------------------------------------------------------------------------|--------------------|----------------------------------------------------------------------------------------------------------------------------------------------------------------------|
| Representativeness of the exposed cohort                                 | Low risk           | Somewhat representative                                                                                                                                              |
| Selection of the non-exposed cohort                                      | Low risk           | Drawn from the same community as the exposed cohort                                                                                                                  |
| Ascertainment of exposure                                                | Low risk           | Secure record                                                                                                                                                        |
| Demonstration that outcome of interest was not present at start of study | Low risk           | Yes                                                                                                                                                                  |
| Controls for Most importat factor                                        | Low risk           | Yes, T-stage N stage                                                                                                                                                 |
| Study controls for any additional factor                                 | Low risk           | Yes, CIS, LVI and antother informations                                                                                                                              |
| Assessment of outcome                                                    | Low risk           | Record linkage                                                                                                                                                       |
| Was follow-up long enough for outcomes to occur                          | Low risk           | median follow up of 40 months (20-76), 3 year RFS OS                                                                                                                 |
| Adequacy of follow up of cohorts                                         | Low risk           | Subjects lost to follow up unlikely to introduce bias- number lost less than or equal to 20% or description of those lost suggested no different from those followed |

## Results data

### *Huang 2016*

## References

Jiwei Huang, Yichu Yuan, Yanqing Wang, Jin Zhang, Wen Kong, Haige Chen, Yonghui Chen, Yiran Huang. Prognostic value of preoperative plasma fibrinogen level and platelet-to-lymphocyte ratio (F-PLR) in patients with localized upper tract urothelial carcinoma Jiwei. *Oncotarget* 2017;8(22):36761-36771. [DOI: 10.18632/oncotarget.13611]

## Characteristics

|                      |                                            |
|----------------------|--------------------------------------------|
| <b>Methods</b>       | Retrospective                              |
| <b>Participants</b>  | T4N0M0, Urothelial carcinoma uppertract    |
| <b>Interventions</b> | pre-treatment PLR(>241.2), NLR (>3.22)     |
| <b>Outcomes</b>      | Cancer specific survival, Overall Survival |
| <b>Notes</b>         |                                            |

## Risk of bias table

| Bias                                                                     | Authors' judgement | Support for judgement                                                                                                                                                |
|--------------------------------------------------------------------------|--------------------|----------------------------------------------------------------------------------------------------------------------------------------------------------------------|
| Representativeness of the exposed cohort                                 | Low risk           | Somewhat representative                                                                                                                                              |
| Selection of the non-exposed cohort                                      | Low risk           | Drawn from the same community as the exposed cohort                                                                                                                  |
| Ascertainment of exposure                                                | Low risk           | Secure record                                                                                                                                                        |
| Demonstration that outcome of interest was not present at start of study | Low risk           | Yes                                                                                                                                                                  |
| Controls for Most importat factor                                        | Low risk           | Yes, T stage/ N stage                                                                                                                                                |
| Study controls for any additional factor                                 | Low risk           | Yes, LVI, Multifocality, Adj ChemoTx                                                                                                                                 |
| Assessment of outcome                                                    | Low risk           | Record linkage                                                                                                                                                       |
| Was follow-up long enough for outcomes to occur                          | Low risk           | Yes                                                                                                                                                                  |
| Adequacy of follow up of cohorts                                         | Low risk           | Subjects lost to follow up unlikely to introduce bias- number lost less than or equal to 20% or description of those lost suggested no different from those followed |

## Results data

### Ito 2016

## References

KEIICHI ITO, JUNICHI ASAKUMA, KENJI KURODA, KAZUYOSHI TACHI, AKINORI SATO, AKIO Horiguchi, KENJI SEGUCHI, TOMOHIKO ASANO. Preoperative risk factors for extraurothelial recurrence in patients with ureteral cancer treated with radical nephroureterectomy. MOLECULAR AND CLINICAL ONCOLOGY 2015;Aug:530-536.

## Characteristics

|               |                                      |
|---------------|--------------------------------------|
| Methods       | Retrospective                        |
| Participants  | Radical Nephroureterectomy, N0M0, 71 |
| Interventions | pre-treatment NLR                    |
| Outcomes      | Progression (1-3 year)               |
| Notes         |                                      |

## Risk of bias table

| Bias                                                                     | Authors' judgement | Support for judgement                                                                                                                                                |
|--------------------------------------------------------------------------|--------------------|----------------------------------------------------------------------------------------------------------------------------------------------------------------------|
| Representativeness of the exposed cohort                                 | Low risk           | Somewhat representative                                                                                                                                              |
| Selection of the non-exposed cohort                                      | Low risk           | Drawn from the same community as the exposed cohort                                                                                                                  |
| Ascertainment of exposure                                                | Low risk           | Secure record                                                                                                                                                        |
| Demonstration that outcome of interest was not present at start of study | Low risk           | Yes                                                                                                                                                                  |
| Controls for Most important factor                                       | Low risk           | Yes, T stage                                                                                                                                                         |
| Study controls for any additional factor                                 | Low risk           | Tes, Tumor size, Cytology, Age                                                                                                                                       |
| Assessment of outcome                                                    | Low risk           | Record linkage                                                                                                                                                       |
| Was follow-up long enough for outcomes to occur                          | Unclear risk       | Uncertain (over 80% was not progressed within follow up period)                                                                                                      |
| Adequacy of follow up of cohorts                                         | Low risk           | Subjects lost to follow up unlikely to introduce bias- number lost less than or equal to 20% or description of those lost suggested no different from those followed |

## Results data

### Cheng 2016

## References

Yen-Chen Cheng, Chun-Nung Huang, Wen-Jeng Wu, Ching-Chia Li, Hung-Lung Ke, Wei-Ming Li, Hung-Pin Tu, Chien-Feng Li, Lin-Li Chang, Hsin-Chih Yeh. The Prognostic Significance of Inflammation-Associated Blood Cell Markers in Patients with Upper Tract Urothelial Carcinoma. *Annals of Surgical Oncology* 2016;23(1):343-351. [DOI: 10.1245/s10434-015-4781-z]

## Characteristics

|                      |                                            |
|----------------------|--------------------------------------------|
| <b>Methods</b>       | Retrospective                              |
| <b>Participants</b>  | Radical Nephroureterectomy, 420            |
| <b>Interventions</b> | pre-treatment NLR, WBC, RDW                |
| <b>Outcomes</b>      | Overall survival, Cancer Specific survival |
| <b>Notes</b>         |                                            |

## Risk of bias table

| Bias                                                                     | Authors' judgement | Support for judgement                                                                                                                                                |
|--------------------------------------------------------------------------|--------------------|----------------------------------------------------------------------------------------------------------------------------------------------------------------------|
| Representativeness of the exposed cohort                                 | Low risk           | Somewhat representative                                                                                                                                              |
| Selection of the non-exposed cohort                                      | Low risk           | Drawn from the same community as the exposed cohort                                                                                                                  |
| Ascertainment of exposure                                                | Low risk           | Secure record                                                                                                                                                        |
| Demonstration that outcome of interest was not present at start of study | Low risk           | Yes                                                                                                                                                                  |
| Controls for Most important factor                                       | Low risk           | Yes, T, N stage                                                                                                                                                      |
| Study controls for any additional factor                                 | Low risk           | Yes, OP type, GFR, Tumor location, Grade                                                                                                                             |
| Assessment of outcome                                                    | Low risk           | Record linkage                                                                                                                                                       |
| Was follow-up long enough for outcomes to occur                          | Low risk           | Yes                                                                                                                                                                  |
| Adequacy of follow up of cohorts                                         | Low risk           | Subjects lost to follow up unlikely to introduce bias- number lost less than or equal to 20% or description of those lost suggested no different from those followed |

## Results data

### *Kim 2015*

## References

Myong Kim, Kyung Chul Moon, Woo Suk Choi, Chang Wook Jeong, Cheol Kwak, Hyeon Hoe Kim, Ja Hyeon Ku. Prognostic value of systemic inflammatory responses in patients with upper urinary tract urothelial carcinoma. 2015 33;10:1439-1457. [DOI: 10.1007/s00345-015-1484-9]

## Characteristics

|                      |                                                            |
|----------------------|------------------------------------------------------------|
| <b>Methods</b>       | Retrospective                                              |
| <b>Participants</b>  | non-metastatic UTUC, NUx, 277                              |
| <b>Interventions</b> | pre-treatment NLR, derived NLR, inflammatory markers       |
| <b>Outcomes</b>      | 5- year Recurrence free survival, Cancer specific survival |
| <b>Notes</b>         |                                                            |

## Risk of bias table

| Bias                                                                     | Authors' judgement | Support for judgement                                                                                                                                                 |
|--------------------------------------------------------------------------|--------------------|-----------------------------------------------------------------------------------------------------------------------------------------------------------------------|
| Representativeness of the exposed cohort                                 | Low risk           | Truly representative                                                                                                                                                  |
| Selection of the non-exposed cohort                                      | Low risk           | Drawn from the same community as the exposed cohort                                                                                                                   |
| Ascertainment of exposure                                                | Low risk           | Secure record                                                                                                                                                         |
| Demonstration that outcome of interest was not present at start of study | Low risk           | Yes                                                                                                                                                                   |
| Controls for Most important factor                                       | Low risk           | Yes, Pathologic stage N stage                                                                                                                                         |
| Study controls for any additional factor                                 | Low risk           | Operation findings, PSM, LVI, CIS                                                                                                                                     |
| Assessment of outcome                                                    | Low risk           | Record linkage                                                                                                                                                        |
| Was follow-up long enough for outcomes to occur                          | Low risk           | 5- year                                                                                                                                                               |
| Adequacy of follow up of cohorts                                         | Low risk           | Subjects lost to follow up unlikely to introduce bias- number lost less than or equal to 20% or description of those lost suggested no different from those followed. |

## Results data

### *Sung 2015*

## References

Hyun Hwan Sung, Hwang Gyun Jeon, Byong Chang Jeong and Seong Il Seo, Seong Soo Jeon, Han-Yong Choi, Hyun Moo Lee. Clinical significance of prognosis using the neutrophil-lymphocyte ratio and erythrocyte sedimentation rate in patients undergoing radical nephroureterectomy for upper urinary tract urothelial carcinoma. *BJU International* 2015;115(4):587-594. [DOI: 10.1111/bju.12846]

## Characteristics

|                      |                                       |
|----------------------|---------------------------------------|
| <b>Methods</b>       | Retrospective                         |
| <b>Participants</b>  | UTUC, Radical Nephroureterectomy, 410 |
| <b>Interventions</b> | pre treatment NLR $\geq 2.5$          |
| <b>Outcomes</b>      | 5-year Progression free survival      |
| <b>Notes</b>         |                                       |

## Risk of bias table

| Bias                                                                     | Authors' judgement | Support for judgement                                                                                                                                                 |
|--------------------------------------------------------------------------|--------------------|-----------------------------------------------------------------------------------------------------------------------------------------------------------------------|
| Representativeness of the exposed cohort                                 | Low risk           | Somewhat representative                                                                                                                                               |
| Selection of the non-exposed cohort                                      | Low risk           | Drawn from the same community as the exposed cohort                                                                                                                   |
| Ascertainment of exposure                                                | Low risk           | Secure record                                                                                                                                                         |
| Demonstration that outcome of interest was not present at start of study | Low risk           | Yes,                                                                                                                                                                  |
| Controls for Most important factor                                       | Low risk           | Yes, T stage                                                                                                                                                          |
| Study controls for any additional factor                                 | Low risk           | Yes, Multifocality, CIS, histologic variants                                                                                                                          |
| Assessment of outcome                                                    | Low risk           | Record linkage                                                                                                                                                        |
| Was follow-up long enough for outcomes to occur                          | Low risk           | Yes, 5 year                                                                                                                                                           |
| Adequacy of follow up of cohorts                                         | Low risk           | Subjects lost to follow up unlikely to introduce bias- number lost less than or equal to 20% or description of those lost suggested no different from those followed. |

## Results data

### **Tanaka 2014**

## References

Nobuyuki Tanaka, Eiji Kikuchi, Kent Kanao, Kazuhiro Matsumoto, Suguru Shirotake, Yasumasa Miyazaki, Hiroaki Kobayashi, Gou Kaneko, Masayuki Hagiwara, Hiroki Ide, Jun Obata, Katsura Hoshino, Nozomi Hayakawa, Takeo Kosaka, Satoshi Hara, Masafumi Oyama, Tetsuo Momma, Yosuke Nakajima, Masahiro Jinzaki, Mototsugu Oya. A Multi-Institutional Validation of the Prognostic Value of the Neutrophil-to-Lymphocyte Ratio for Upper Tract Urothelial Carcinoma Treated with Radical Nephroureterectomy. *Annals of Surgical Oncology* 2014;12:4041-4048. [DOI: 10.1245/s10434-014-3830-3]

## Characteristics

|                      |                                                       |
|----------------------|-------------------------------------------------------|
| <b>Methods</b>       | Retrospective                                         |
| <b>Participants</b>  | Radical nephroureterectomy, UTUC 665                  |
| <b>Interventions</b> | pre-treatment NLR > 3.0                               |
| <b>Outcomes</b>      | 5 year Recurrence free survival, Cancer Free Survival |
| <b>Notes</b>         |                                                       |



## Risk of bias table

| Bias                                                                     | Authors' judgement | Support for judgement                                                                                                                                                |
|--------------------------------------------------------------------------|--------------------|----------------------------------------------------------------------------------------------------------------------------------------------------------------------|
| Representativeness of the exposed cohort                                 | Low risk           | Somewhat representative                                                                                                                                              |
| Selection of the non-exposed cohort                                      | Low risk           | Drawn from the same community as the exposed cohort                                                                                                                  |
| Ascertainment of exposure                                                | Low risk           | Secure record                                                                                                                                                        |
| Demonstration that outcome of interest was not present at start of study | Low risk           | Yes                                                                                                                                                                  |
| Controls for Most important factor                                       | Low risk           | Yes, pathologic T stage, N stage                                                                                                                                     |
| Study controls for any additional factor                                 | Low risk           | Yes, CIS, ChemoTx                                                                                                                                                    |
| Assessment of outcome                                                    | Low risk           | Record linkage                                                                                                                                                       |
| Was follow-up long enough for outcomes to occur                          | Low risk           | 5-year                                                                                                                                                               |
| Adequacy of follow up of cohorts                                         | Low risk           | Subjects lost to follow up unlikely to introduce bias- number lost less than or equal to 20% or description of those lost suggested no different from those followed |

## Results data

**Luo 2014**

## References

Hao-Lun Luo, Yen-Ta Chen, Yao-Chi Chuang, Yuan-Tso Cheng, Wei-Ching Lee, Chih-Hsiung Kang, Po-Hui Chiang. Subclassification of upper urinary tract urothelial carcinoma by the neutrophil-to-lymphocyte ratio (NLR) improves prediction of oncological outcome. *BJU International* 2014;113:144-149. [DOI: 10.1111/bju.12582]

## Characteristics

|                      |                                                             |
|----------------------|-------------------------------------------------------------|
| <b>Methods</b>       | Retrospective                                               |
| <b>Participants</b>  | UTUC, Radical nephroureterectomy, 234                       |
| <b>Interventions</b> | pre-treatment NLR (>3)                                      |
| <b>Outcomes</b>      | 5- year Cancer Specific survival, Progression Free survival |
| <b>Notes</b>         |                                                             |

## Risk of bias table

| Bias                                                                     | Authors' judgement | Support for judgement                                                                                                                                                 |
|--------------------------------------------------------------------------|--------------------|-----------------------------------------------------------------------------------------------------------------------------------------------------------------------|
| Representativeness of the exposed cohort                                 | Low risk           | Somewhat representative                                                                                                                                               |
| Selection of the non-exposed cohort                                      | Low risk           | Drawn from the same community as the exposed cohort                                                                                                                   |
| Ascertainment of exposure                                                | Low risk           | Secure record                                                                                                                                                         |
| Demonstration that outcome of interest was not present at start of study | Low risk           | Yes                                                                                                                                                                   |
| Controls for Most important factor                                       | Low risk           | Yes, Pathologic T stage                                                                                                                                               |
| Study controls for any additional factor                                 | Low risk           | Yes, Tumor grade, Smokin, CIS, histologic variants                                                                                                                    |
| Assessment of outcome                                                    | Low risk           | Record linkage                                                                                                                                                        |
| Was follow-up long enough for outcomes to occur                          | Low risk           | 5-year                                                                                                                                                                |
| Adequacy of follow up of cohorts                                         | Low risk           | Subjects lost to follow up unlikely to introduce bias- number lost less than or equal to 20% or description of those lost suggested no different from those followed. |

## Results data

**Dalpiaz 2014**

## References

Orietta Dalpiaz, Georg C. Ehrlich, Sebastian Mannweiler, Jessica M. Martín Hernández, Armin Gerger, Tatjana Stojakovic, Karl Pummer, Richard Zigeuner, Martin Pichler, Georg C. Hutterer. Validation of pretreatment neutrophil-lymphocyte ratio as a prognostic factor in a European cohort of patients with upper tract urothelial carcinoma. *BJU International* 2014;114:334-339. [DOI: 10.1111/bju.12441]

## Characteristics

|                      |                                            |
|----------------------|--------------------------------------------|
| <b>Methods</b>       | Retrospective                              |
| <b>Participants</b>  | UTUC, Radical nephroureterectomy, 202      |
| <b>Interventions</b> | Pre-treatment NLR                          |
| <b>Outcomes</b>      | Cancer Specific survival, Overall Survival |
| <b>Notes</b>         |                                            |

## Risk of bias table

| Bias                                                                     | Authors' judgement | Support for judgement                                                                                                                                               |
|--------------------------------------------------------------------------|--------------------|---------------------------------------------------------------------------------------------------------------------------------------------------------------------|
| Representativeness of the exposed cohort                                 | Low risk           | Somewhat representative                                                                                                                                             |
| Selection of the non-exposed cohort                                      | Low risk           | Drawn from the same community as the exposed cohort                                                                                                                 |
| Ascertainment of exposure                                                | Low risk           | Secure record                                                                                                                                                       |
| Demonstration that outcome of interest was not present at start of study | Low risk           | Yes                                                                                                                                                                 |
| Controls for Most important factor                                       | Low risk           | Yes, pathologic T stage,                                                                                                                                            |
| Study controls for any additional factor                                 | Low risk           | Yes, Tumor grade, LVI, ECOG-PS                                                                                                                                      |
| Assessment of outcome                                                    | Low risk           | Record linkage                                                                                                                                                      |
| Was follow-up long enough for outcomes to occur                          | Low risk           | Yes, 5 year                                                                                                                                                         |
| Adequacy of follow up of cohorts                                         | Low risk           | Subjects lost to follow up unlikely to introduce bias-number lost less than or equal to 20% or description of those lost suggested no different from those followed |

## Results data

**Azuma 2013**

## References

Takeshi Azuma, Yukihide Matayoshi, Keiko Odani, Yohsuke Sato, Yujiro Sato, Yasushi Nagase, Masaya Oshi. Preoperative neutrophil-lymphocyte ratio as an independent prognostic marker for patients with upper urinary tract urothelial carcinoma. *Clinical Genitourinary Cancer* 2013;11(3):337-341. [DOI: 10.1016/j.clgc.2013.04.003]

## Characteristics

|                      |                                                           |
|----------------------|-----------------------------------------------------------|
| <b>Methods</b>       | Retrospective                                             |
| <b>Participants</b>  | URUC, radical nephroureterectomy, 137                     |
| <b>Interventions</b> | pre-treatment NLR $\geq 2.5$                              |
| <b>Outcomes</b>      | 5 year Recurrence free survival, Cancer specific survival |
| <b>Notes</b>         |                                                           |

## Risk of bias table

| Bias                                                                     | Authors' judgement | Support for judgement                                                                                                                                                |
|--------------------------------------------------------------------------|--------------------|----------------------------------------------------------------------------------------------------------------------------------------------------------------------|
| Representativeness of the exposed cohort                                 | Low risk           | Somewhat representative                                                                                                                                              |
| Selection of the non-exposed cohort                                      | Low risk           | Drawn from the same community as the exposed cohort                                                                                                                  |
| Ascertainment of exposure                                                | Low risk           | Secure record                                                                                                                                                        |
| Demonstration that outcome of interest was not present at start of study | Low risk           | Yes                                                                                                                                                                  |
| Controls for Most important factor                                       | Low risk           | Yes , pathologic T stage                                                                                                                                             |
| Study controls for any additional factor                                 | Low risk           | Yes, Grade, LVI, Crp level                                                                                                                                           |
| Assessment of outcome                                                    | Low risk           | Record linkage                                                                                                                                                       |
| Was follow-up long enough for outcomes to occur                          | Low risk           | 5-year                                                                                                                                                               |
| Adequacy of follow up of cohorts                                         | Low risk           | Subjects lost to follow up unlikely to introduce bias- number lost less than or equal to 20% or description of those lost suggested no different from those followed |

## Results data

### Song 2016

## References

Xin song, Gui-Ming Zhang, Xiao-cheng Ma, Lei Lu, Bin Li, Dong-Yue Chai, Li-Jiang Sun. Comparison of preoperative neutrophil-lymphocyte, lymphocyte-monocyte, and platelet-lymphocyte ratios in patients with upper urinary tract urothelial carcinoma undergoing radical nephroureterectomy. *OncoTargets and Therapy* 2016;9:1399-1407. [DOI: 10.2147/OTT.S97520]

## Characteristics

|                      |                                      |
|----------------------|--------------------------------------|
| <b>Methods</b>       | Retrospective                        |
| <b>Participants</b>  | URUC, Radical nephroureterectomy 140 |
| <b>Interventions</b> | pre-treatment NLR , PLR, LMR         |
| <b>Outcomes</b>      | 5-year Progression free survival     |
| <b>Notes</b>         |                                      |

## Risk of bias table

| Bias                                                                     | Authors' judgement | Support for judgement                                                                                                                                                      |
|--------------------------------------------------------------------------|--------------------|----------------------------------------------------------------------------------------------------------------------------------------------------------------------------|
| Representativeness of the exposed cohort                                 | Low risk           | Somewhat representative                                                                                                                                                    |
| Selection of the non-exposed cohort                                      | Low risk           | Drawn from the same community as the exposed cohort (                                                                                                                      |
| Ascertainment of exposure                                                | Low risk           | Secure record                                                                                                                                                              |
| Demonstration that outcome of interest was not present at start of study | Low risk           | Yes                                                                                                                                                                        |
| Controls for Most importat factor                                        | Low risk           | Yes, Pathologic stage,                                                                                                                                                     |
| Study controls for any additional factor                                 | Low risk           | Yes, Smoking, Tumor grade, LVI                                                                                                                                             |
| Assessment of outcome                                                    | Low risk           | Record linkage                                                                                                                                                             |
| Was follow-up long enough for outcomes to occur                          | Low risk           | 5 year                                                                                                                                                                     |
| Adequacy of follow up of cohorts                                         | Low risk           | Subjects lost to follow up unlikely to introduce bias-<br>number lost less than or equal to 20% or description of<br>those lost suggested no different from those followed |

## Results data

### Footnotes
